# Supplementary material for: SLC6A14, an amino acid transporter, modifies the primary CF defect in fluid secretion
Source: eLife journal article supplement (doi:10.7554/elife.37963), 2018-07-13
Supplement: supp [file elife-37963-supp-v1.zip]

Archive with 3 entries (3 files):
- elife_poa_e37963_Supplementary_file_1.xlsx
- elife_poa_e37963_Supplementary_file_2.xlsx
- elife_poa_e37963_Transparent_Reporting_File.pdf
