# Supplementary material for: SLC6A14, an amino acid transporter, modifies the primary CF defect in fluid secretion
Source: eLife journal article supplement (doi:10.7554/elife.37963), 2018-07-13
Supplement: supp [file elife-37963-supp-v1.zip › elife_poa_e37963_Supplementary_file_1.xlsx]

## Sheet: Legend
# Abbreviation Full Name
1 Pser O-Phospho-L-serine
2 Asp L-Aspartic Acid
3 Glu L-Glutamic Acid
4 Aad L-α-Aminoadipic Acid
5 Hypro Hydroxy-L-proline
6 Pea O-Phosphoethanolamine
7 Ser L-Serine
8 Asn L-Asparagine
9 Gly Glycine
10 Gln L-Glutamine
11 B-ala β-alanine
12 Sarc L-Sarcosine
13 Tau Taurine
14 His L-Histidine
15 Arg L-Arginine
16 Gaba γ-Amino-n-butyric Acid
17 Cit L-Citrulline
18 Thr L-Threonine
19 Ala L-Alanine
20 Baib D,L-β-Aminoisobutyric Acid
21 Carn L-Carnosine
22 Pro L-Proline
23 1M-His 1-Methyl-L-histidine
24 Ans L-Anserine
25 3M-His 3-Methyl-L-histidine
26 Crea Creatinine
27 Aab L-α-Amino-n-butyric Acid
28 Tyr L-Tyrosine
29 Val L-Valine
30 Met L-Methionine
31 Cysta1 Cystathionine [L(+) and/or L(-) Allo-]
32 Cysta2 Cystathionine [L(+) and/or L(-) Allo-]
33 Cys L-Cystine
34 Ile L-Isoleucine
35 Leu L-Leucine
36 Nleu Norleucine (Internal Standard)
37 HyLys1 δ-Hydroxylysine
38 HyLys2 δ-Hydroxylysine
39 Phe L-Phenylalanine
40 Trp L-Tryptophan
41 Orn L-Ornithine
42 Lys L-Lysine

## Sheet: WT WT
							MEAN	SD		micromolar						MEAN	SD
Pser	38.528				1008.86	1198.89	748.762	622.376		1.71236				44.8384	53.2842	33.2783	27.6612
Asp	1214.21	1787.78	1106.01	1125.1	1358.85	1070.07	1277	270.803		53.9651	79.4571	49.1559	50.0046	60.3932	47.5587	56.7558	12.0357
Glu	4061.06	7481.57	5258.73	3044.95	4799.78	3760.13	4734.37	1554.54		180.492	332.514	233.721	135.331	213.323	167.117	210.416	69.0906
Aad	63.362	69.121	140.433	61.089		75.813	81.9636	33.1783		2.81609	3.07204	6.24147	2.71507		3.36947	3.64283	1.47459
Hypro	483.597	622.85	464.974	381.362	547.799	342.562	473.857	103.57		21.4932	27.6822	20.6655	16.9494	24.3466	15.225	21.0603	4.60311
Ser	4069.56	4849.27	5081.15	4415.76	6219.13	3804.98	4739.97	865.452		180.869	215.523	225.829	196.256	276.406	169.11	210.666	38.4645
Asn	1323.96	1654.94	1558.37	1447.61	1951.52	1321.45	1542.98	239.089		58.8428	73.5529	69.2607	64.3384	86.7343	58.7311	68.5767	10.6262
Gly	6282.39	8987.26	8962.17	7849.28	12090.8	7031.99	8533.98	2041.29		279.217	399.434	398.319	348.857	537.369	312.533	379.288	90.7239
Gln	20779.9	18635.4	26580.1	22110.7	31476.9	23097.9	23780.2	4600.05		923.551	828.24	1181.34	982.696	1398.97	1026.57	1056.9	204.447
B-ala	143.357	151.285	133.915	161.466	199.338	166.082	159.24	22.8759		6.37142	6.72378	5.95178	7.17627	8.85947	7.38142	7.07736	1.0167
Sarc						542.026	542.026	#DIV/0!							24.09	24.09	#DIV/0!
Tau	21665.5	27927.3	24025.2	27425.1	47273.7	24600.7	28819.6	9330.19		962.909	1241.21	1067.79	1218.89	2101.05	1093.36	1280.87	414.675
His	1423.48	1446.62	1655.54	1846.15	2044.34	1595.34	1668.58	239.835		63.2659	64.294	73.5794	82.0512	90.8596	70.9042	74.159	10.6593
Arg	179.892	188.867	215.387	1445.64	194.059	146.151	394.999	515.203		7.9952	8.39409	9.57276	64.2507	8.62484	6.4956	17.5555	22.8979
Gaba					194.19	189.995	192.093	2.96631						8.63067	8.44422	8.53744	0.131836
Cit	3284.8	3636.2	3176.89	2062.43	3889.91	2107.15	3026.23	772.163		145.991	161.609	141.195	91.6633	172.885	93.6511	134.499	34.3184
Thr	4298.94	5001.44	5895.36	4304	6049.78	4748.11	5049.61	765.284		191.064	222.286	262.016	191.289	268.879	211.027	224.427	34.0126
Ala	14200	13395.1	17618.1	14074.1	21821.9	14150.4	15876.6	3273.41		631.113	595.34	783.027	625.516	969.86	628.906	705.627	145.485
NH3+Baib	2088.96	1612.49	2649.16	364.029	1791.79	1842.5	1724.82	757.59		92.8427	71.6662	117.741	16.1791	79.6352	81.889	76.6588	33.6707
Carn	2535.74	2178.05	3713.38	3187.65	1083.05	1463.83	2360.28	1001.43		112.699	96.802	165.039	141.673	48.1356	65.059	104.901	44.5082
Pro	3943.8	4619.93	4236.44	3804.56	6695.16	4587.87	4647.96	1055.65		175.28	205.33	188.286	169.092	297.563	203.905	206.576	46.9176
1M-His	743.118	565.689	450.863	503.547	71.222	153.793	414.705	255.307		33.0275	25.1417	20.0384	22.3799	3.16542	6.83524	18.4313	11.347
Ans	211.43	263.013	279.592	21.741	342.07	58.302	196.025	128.359		9.39689	11.6895	12.4263	0.966267	15.2031	2.5912	8.71221	5.70483
3M-His	67.898	81.789	77.343	546.641	774.85	448.152	332.779	300.959		3.01769	3.63507	3.43747	24.2952	34.4378	19.9179	14.7902	13.3759
Crea	429.416	550.276	491.815	399.241	534.498	309.121	452.395	91.3853		19.0852	24.4567	21.8584	17.744	23.7555	13.7387	20.1064	4.06157
Aab	193.797	153.076	192.969	142.78	247.257	129.11	176.498	43.6085		8.6132	6.80338	8.5764	6.34578	10.9892	5.73822	7.84436	1.93816
Tyr	2758.2	2354.35	2767.1	2601.18	3760.26	2879.15	2853.37	480.051		122.587	104.638	122.982	115.608	167.123	127.962	126.817	21.3356
Val	8084.64	6974.8	7705.03	6369.75	10956.7	7638.54	7954.91	1591.45		359.317	309.991	342.446	283.1	486.965	339.491	353.552	70.731
Met	2337.02	2796.25	2937.81	2630.5	3485.81	2878.64	2844.34	381.265		103.867	124.278	130.569	116.911	154.925	127.94	126.415	16.9451
RgntPk1							#DIV/0!	#DIV/0!								#DIV/0!	#DIV/0!
Cysta1				61.864	59.515		60.6895	1.66099					2.74951	2.64511		2.69731	0.0738219
Cysta2	514.335	540.088	623.507	1341.04	1881.44	902.012	967.07	545.064		22.8593	24.0039	27.7114	59.6017	83.6195	40.0894	42.9809	24.2251
RgntPk2							#DIV/0!	#DIV/0!								#DIV/0!	#DIV/0!
Cys	76.259	78.461	53.932	109.335	283.835		120.364	93.4863		3.38929	3.48716	2.39698	4.85933	12.6149		5.34953	4.15495
Ile	3736.17	3100.63	3221.67	2502.22	5307.81	3367.38	3539.31	955.488		166.052	137.806	143.185	111.21	235.903	149.661	157.303	42.4661
Leu	6944.62	6365.1	6276.77	5507.38	10368.1	6450.14	6985.35	1720.6		308.65	282.893	278.968	244.772	460.805	286.673	310.46	76.4713
Nleu	375	375	375	375	375	375	375	0		16.6667	16.6667	16.6667	16.6667	16.6667	16.6667	16.6667	0
HyLys1	22.001			33.212			27.6065	7.92737		0.977822			1.47609			1.22696	0.352328
HyLys2				1706.53	137.701	204.671	682.967	887.062					75.8457	6.12004	9.09649	30.3541	39.425
Phe	3496.15	3237.38	3126.39		5653.86	2935.33	3689.82	1116.51		155.384	143.884	138.951		251.283	130.459	163.992	49.6227
Trp	1753.11	1236.01	1436.92	1075.9	1355.53	1733.2	1431.78	270.158		77.916	54.9336	63.8632	47.8176	60.2456	77.0311	63.6345	12.007
Orn	2661.82	3375.58	3544.99	3585.93	2956.94	3077.03	3200.38	364.041		118.303	150.026	157.555	159.375	131.419	136.757	142.239	16.1796
Lys	5705.35	5930.57	6956.98	6013.57	5961.52	6872.39	6240.06	533.739		253.571	263.581	309.199	267.27	264.956	305.439	277.336	23.7217
RgntPk3

## Sheet: delF WT
						MEAN	SD		micromolar					MEAN	SD
Pser					912.663	912.663	#DIV/0!						40.5628	40.5628	#DIV/0!
Asp	671.928	709.778	2558.46	782.11	642.155	1072.89	832.109		29.8635	31.5457	113.709	34.7604	28.5402	47.6838	36.9826
Glu	2667.12	2710.27	6589.08	2517.55	1961.01	3289.01	1868.88		118.539	120.456	292.848	111.891	87.156	146.178	83.0615
Aad	187.613	92.967	207.759		58.854	136.798	72.1435		8.33836	4.13187	9.23373		2.61573	6.07992	3.20638
Hypro	551.282	583.86	652.248	443.645	365.264	519.26	114.364		24.5014	25.9493	28.9888	19.7176	16.234	23.0782	5.08286
Ser	3948.91	4708.44	6502.32	4209.42	4671.8	4808.18	999.44		175.507	209.264	288.992	187.085	207.636	213.697	44.4195
Asn	1424.21	1557.26	1954.38	1367.72	1351.66	1531.04	250.083		63.2984	69.2114	86.8612	60.7875	60.0736	68.0464	11.1148
Gly	6996.59	7761.59	13395.4	9679.73	7445.59	9055.79	2632.96		310.96	344.96	595.353	430.21	330.915	402.48	117.02
Gln	22899.9	22778.1	26620.6	25259.6	23293.5	24170.3	1696.44		1017.77	1012.36	1183.14	1122.65	1035.26	1074.24	75.3971
B-ala	83.606	105.953	156.553	198.012	134.295	135.684	44.4923		3.71582	4.70902	6.95791	8.80053	5.96867	6.03039	1.97744
Sarc					295.135	295.135	#DIV/0!						13.1171	13.1171	#DIV/0!
Tau	23403.6	23233.4	36020.5	19188.4	21534.1	24676	6564.76		1040.16	1032.6	1600.91	852.818	957.069	1096.71	291.767
His	1312.17	1378.86	1703.73	1376.21	1660.39	1486.27	181.362		58.3187	61.2827	75.7215	61.1648	73.7951	66.0565	8.06053
Arg	177.095	183.459	705.773	367.109	141.92	315.071	235.423		7.87089	8.15373	31.3677	16.316	6.30756	14.0032	10.4633
Gaba					175.859	175.859	#DIV/0!						7.81596	7.81596	#DIV/0!
Cit	3140.46	3159.68	2434.46	1992.1	1794.74	2504.29	633.426		139.576	140.43	108.198	88.5377	79.7663	111.302	28.1523
Thr	4878.27	5365.78	7442.98	5020.56	4613	5464.12	1139.07		216.812	238.479	330.799	223.136	205.022	242.85	50.6254
Ala	16946.2	14367.3	20374.5	15161.7	14703.8	16310.7	2479.76		753.163	638.547	905.531	673.854	653.504	724.92	110.211
NH3+Baib	1314.4	1530.15	221.061	488.669	1356.83	982.223	586.06		58.418	68.0068	9.82493	21.7186	60.3035	43.6544	26.0471
Carn	1310.54	1731.29	6065.76	3961.13	1923.07	2998.36	1996.64		58.246	76.9461	269.589	176.05	85.4696	133.26	88.7398
Pro	3884.98	3954.17	4740.32	3503.92	4208.4	4058.36	457.137		172.666	175.741	210.681	155.73	187.04	180.371	20.3172
1M-His	492.777	495.388	489.103	505.196	78.681	412.229	186.554		21.9012	22.0172	21.7379	22.4532	3.49693	18.3213	8.29131
Ans	183.622	108.156	45.672	31.492	26.908	79.17	66.8525		8.16098	4.80693	2.02987	1.39964	1.19591	3.51867	2.97122
3M-His	80.934	32.489	610.591	411.61	332.256	293.576	239.431		3.59707	1.44396	27.1374	18.2938	14.7669	13.0478	10.6414
Crea	862.857	912.845	742.24	526.883	378.406	684.646	226.839		38.3492	40.5709	32.9884	23.417	16.818	30.4287	10.0817
Aab	160.504	180.009	170.722	172.79	222.488	181.303	24.0567		7.13351	8.0004	7.58764	7.67956	9.88836	8.05789	1.06919
Tyr	2673.73	2546.54	2902.13	2224.1	2654.83	2600.27	246.923		118.832	113.18	128.984	98.8488	117.992	115.567	10.9744
Val	6753.96	7422.66	7434.86	5881.25	6958.97	6890.34	636.678		300.176	329.896	330.438	261.389	309.287	306.237	28.2968
Met	3699.78	3801.79	3751.49	2392.57	2298.45	3188.82	771.393		164.435	168.969	166.733	106.337	102.153	141.725	34.2841
RgntPk1						#DIV/0!	#DIV/0!
Cysta1			77.17	87.637		82.4035	7.40129				3.42978	3.89498		3.66238	0.328946
Cysta2	547.79	634.505	1431.5	1138.07	813.924	913.157	367.509		24.3462	28.2002	63.6223	50.5807	36.1744	40.5848	16.3337
RgntPk2						#DIV/0!	#DIV/0!
Cys	98.966	117.433		122.731	137.74	119.218	16.0077		4.39849	5.21924		5.45471	6.12178	5.29856	0.711451
Ile	2955.88	2976.19	3136.47	2329.86	3437.37	2967.15	405.005		131.372	132.275	139.399	103.55	152.772	131.873	18.0002
Leu	5599.51	5511.41	6836.94	5082.06	6170.5	5840.08	678.859		248.867	244.951	303.864	225.869	274.245	259.559	30.1715
Nleu	375	375	375	375	375	375	0		16.6667	16.6667	16.6667	16.6667	16.6667	16.6667
HyLys1			32.497			32.497	#DIV/0!				1.44431			1.44431	#DIV/0!
HyLys2			1858.15	1605.09	200.502	1221.25	893				82.5844	71.3372	8.9112	54.2776	39.6889
Phe	2828.44	3029.89			2861.36	2906.57	108.064		125.709	134.662			127.172	129.181	4.80283
Trp	1735.62	1953.24	1346.75	1357.59	1421.42	1562.92	269.763		77.1389	86.8105	59.8554	60.3372	63.1742	69.4632	11.9895
Orn	1304.4	1605.76	3356.47	2641.13	1568.33	2095.22	870.538		57.9733	71.3672	149.176	117.384	69.7036	93.1208	38.6906
Lys	4752.09	5371.63	7225.77	5502.14	7450.53	6060.43	1202.94		211.204	238.739	321.146	244.54	331.135	269.353	53.4642
RgntPk3

## Sheet: delF KO
								MEAN	SD		micromolar							MEAN	SD
Pser						977.699	534.527	756.113	313.37							43.4533	23.7568	33.605	13.9276
Asp	670.462	412.234	675.624	1356.92	946.373	1063.25	942.75	866.802	308.933		29.7983	18.3215	30.0277	60.3075	42.061	47.2557	41.9	38.5245	13.7304
Glu	2718.95	976.786	1814.97	4641.53	3350.83	4100.05	2680.6	2897.67	1267.1		120.842	43.4127	80.6652	206.29	148.926	182.224	119.138	128.785	56.3154
Aad	139.5		44.565	179.944	71.179	122.801	65.5	103.915	51.9098		6.2		1.98067	7.99751	3.16351	5.45782	2.91111	4.61844	2.3071
Hypro	684.231	535.499	678.971	523.013	382.803	792.531	454.962	578.859	144.666		30.4103	23.8	30.1765	23.245	17.0135	35.2236	20.2205	25.727	6.42958
Ser	5503.94	3862.8	4008.62	6353.87	5465.71	8292.68	5607.41	5585	1494.15		244.619	171.68	178.161	282.394	242.92	368.564	249.218	248.222	66.4068
Asn	1783.02	1213.41	1168.6	1915.68	1681.64	2582.2	1769.03	1730.51	474.24		79.2454	53.9293	51.9379	85.1414	74.7396	114.764	78.6235	76.9116	21.0773
Gly	8533.2	9674.39	8031.71	12159.9	9072.79	16557.2	8789.88	10402.7	3027.15		379.253	429.973	356.965	540.441	403.235	735.873	390.661	462.343	134.54
Gln	31391.5	27005.4	23960.9	27943.8	22078.9	38483.5	26007	28124.4	5441.13		1395.18	1200.24	1064.93	1241.95	981.283	1710.38	1155.86	1249.97	241.828
B-ala	76.453	74.111	61.749	215.275	174.395	171.488	166.389	134.266	61.6574		3.39791	3.29382	2.7444	9.56778	7.75089	7.62169	7.39507	5.96737	2.74033
Sarc							360.685	360.685	#DIV/0!								16.0304	16.0304	#DIV/0!
Tau	39518.3	23578.6	25305.6	24151.8	30558.8	44609.7	20808	29790.1	9000.12		1756.37	1047.94	1124.69	1073.41	1358.17	1982.65	924.799	1324	400.005
His	1843.68	1948.5	1467.67	1959.73	1942.38	1916.29	1705.13	1826.2	181.618		81.9412	86.5999	65.2296	87.0992	86.3281	85.1682	75.7836	81.1643	8.07191
Arg	245.718	210.115	220.345	536.806	352.134	122.227	160.955	264.043	140.269		10.9208	9.33844	9.79311	23.858	15.6504	5.43231	7.15356	11.7352	6.23417
Gaba						312.306	207.434	259.87	74.1557							13.8803	9.21929	11.5498	3.29581
Cit	3678.11	2617.72	2259.79	2633.56	2635.23	4501.66	2642.31	2995.48	796.242		163.472	116.343	100.435	117.047	117.121	200.074	117.436	133.133	35.3885
Thr	5814.1	4290.85	4387.64	7148.27	5343.84	8839.53	5472.43	5899.52	1611.16		258.405	190.705	195.006	317.701	237.504	392.868	243.219	262.201	71.6073
Ala	22800.1	13095.8	13839.4	21714.9	16117.1	27109.1	17140.3	18831	5174.13		1013.34	582.035	615.085	965.108	716.316	1204.85	761.791	836.932	229.961
NH3+Baib	1737.42	960.911	1022.18	414.911	366.925	1935.87	2458.28	1270.93	793.467		77.2188	42.7072	45.4304	18.4405	16.3078	86.0386	109.257	56.4857	35.2652
Carn	1877.75	1280.56	1288.86	6012.21	5528.23	2257.73	2253.19	2928.36	1986.71		83.4554	56.9139	57.2824	267.209	245.699	100.343	100.142	130.149	88.2981
Pro	4503.05	2798.3	2331.23	5159.65	3821.74	9487.18	6135.85	4891	2414.28		200.135	124.369	103.61	229.318	169.855	421.652	272.705	217.378	107.301
1M-His	499.972	203.263	163.08	816.977	522.344	105.74	207.737	359.873	260.113		22.221	9.03391	7.248	36.3101	23.2153	4.69956	9.23276	15.9944	11.5606
Ans	175.524	149.358	75.791		274.063	330.635	69.578	179.158	105.4		7.80107	6.63813	3.36849		12.1806	14.6949	3.09236	7.96259	4.68445
3M-His	112.536	149.534	65.273	459.6	550.388	591.299	360.526	327.022	217.736		5.0016	6.64596	2.90102	20.4267	24.4617	26.28	16.0234	14.5343	9.67714
Crea	493.52	323.007	254.634	555.633	508.274	536.148	437.944	444.166	114.07		21.9342	14.3559	11.3171	24.6948	22.59	23.8288	19.4642	19.7407	5.06978
Aab	205.472	132.963	111.17	180.364	136.618	289.085	211.005	180.954	61.0129		9.13209	5.90947	4.94089	8.01618	6.07191	12.8482	9.378	8.04239	2.71169
Tyr	3077.43	2547.17	1838.54	3446.96	3044.13	4469.13	3451.28	3124.95	817.973		136.775	113.208	81.7127	153.198	135.295	198.628	153.39	138.887	36.3544
Val	9221.21	8273.98	5300.54	8466.84	8551.1	11670.4	7316.79	8400.12	1923.23		409.832	367.733	235.579	376.304	380.049	518.683	325.191	373.339	85.477
Met	2739.56	2439.69	2156.11	3452.74	2282.89	5622.9	3043.77	3105.38	1198.4		121.758	108.431	95.827	153.455	101.462	249.907	135.279	138.017	53.2621
RgntPk1								#DIV/0!	#DIV/0!									#DIV/0!	#DIV/0!
Cysta1				74.942	43.793	36.511		51.7487	20.4134					3.33076	1.94636	1.62271		2.29994	0.90726
Cysta2	723.552	577.568	566.018	1185.19	445.491	2089.93	882.509	924.324	569.6		32.1579	25.6697	25.1564	52.6753	19.7996	92.886	39.2226	41.0811	25.3156
RgntPk2								#DIV/0!	#DIV/0!									#DIV/0!	#DIV/0!
Cys	47.394	164.612	85.34	49.266	102.471	111.807	93.902	93.5417	40.0452		2.1064	7.31609	3.79289	2.1896	4.55427	4.9692	4.17342	4.15741	1.77978
Ile	4361.26	4234.07	2279.81	3532.46	3678.66	5206.54	3035.48	3761.18	953.329		193.834	188.181	101.325	156.998	163.496	231.402	134.91	167.164	42.3702
Leu	7968.24	7613.75	4500.29	7173.91	6878.47	10968.6	5922.38	7289.38	1997.2		354.144	338.389	200.013	318.841	305.71	487.494	263.217	323.972	88.7642
Nleu	375	375	375	375	375	375	375	375	0		16.6667	16.6667	16.6667	16.6667	16.6667	16.6667	16.6667	16.6667	0
HyLys1	27.688			34.556				31.122	4.85641		1.23058			1.53582				1.3832	0.21584
HyLys2				1912.41	1985.79	137.393	165.443	1050.26	1038.39					84.9959	88.2572	6.10636	7.35302	46.6781	46.1505
Phe	3879.78	3547.82	2342.48			5563.06	2959.4	3658.51	1215.44		172.435	157.681	104.11			247.247	131.529	162.6	54.0197
Trp	1797.14	1326.12	1148.24	1864.86	1639.89	1407.89	1923.42	1586.79	297.208		79.8729	58.9385	51.0327	82.8828	72.8839	62.5728	85.4852	70.5241	13.2093
Orn	1584.73	1276.35	834.122	3425.97	1596.71	1813.72	2780.59	1901.74	897.02		70.4323	56.7266	37.0721	152.266	70.9648	80.6096	123.582	84.5218	39.8676
Lys	6659.76	5337.17	4176.26	7636.09	7093.34	7105.41	9331.92	6762.85	1649.39		295.989	237.208	185.611	339.382	315.259	315.796	414.752	300.571	73.3062
RgntPk3

## Sheet: WT KO
							MEAN	SD		micromolar						MEAN	SD
Pser						471.667	471.667	#DIV/0!							20.963	20.963	#DIV/0!
Asp	1637.95	3211.82	888.233	558.949	1034.95	1105.94	1406.31	951.639		72.798	142.748	39.477	24.8422	45.9977	49.153	62.5026	42.2951
Glu	5019.19	9649.22	3738.13	2890.98	4450.17	3666.06	4902.29	2436.4		223.075	428.854	166.139	128.488	197.785	162.936	217.88	108.285
Aad	92.317	231.037		102.418	70.35	61.665	111.557	68.7684		4.10298	10.2683		4.55191	3.12667	2.74067	4.95811	3.05638
Hypro	384.074	716.019	380.544	530.735	371.83	309.831	448.839	149.803		17.07	31.8231	16.9131	23.5882	16.5258	13.7703	19.9484	6.6579
Ser	4892.44	7421.28	4521.27	4547.97	4193.39	4362.29	4989.77	1213.62		217.442	329.835	200.945	202.132	186.373	193.88	221.768	53.9386
Asn	1550.2	2310.98	1593.36	1583.94	1621.68	1431.92	1682.01	315.161		68.8978	102.71	70.816	70.3974	72.0749	63.6408	74.7562	14.0072
Gly	9278.17	12367.7	8867.99	8500.49	8018.69	7776.03	9134.84	1675.57		412.363	549.675	394.133	377.799	356.386	345.601	405.993	74.4698
Gln	23557.9	26259.7	24275	34518.3	23076	21161.7	25474.8	4730.16		1047.02	1167.1	1078.89	1534.15	1025.6	940.519	1132.21	210.229
B-ala	134.225	209.09	98.308	273.396	172.922	152.41	173.392	61.461		5.96556	9.29289	4.36924	12.1509	7.68542	6.77378	7.7063	2.7316
Sarc						85.431	85.431	#DIV/0!							3.79693	3.79693	#DIV/0!
Tau	40063.8	44216.6	46439.9	26246.1	28917	25183.8	35177.9	9500.13		1780.61	1965.18	2064	1166.49	1285.2	1119.28	1563.46	422.228
His	2456.62	2277.75	1563.45	2174.03	1446.99	1356.29	1879.19	477.31		109.183	101.233	69.4868	96.6237	64.3105	60.2794	83.5195	21.2138
Arg	586.175	646.695	573.851	464.454	206.513	148.997	437.781	210.606		26.0522	28.742	25.5045	20.6424	9.17836	6.62209	19.4569	9.36025
Gaba						194.22	194.22	#DIV/0!							8.632	8.632	#DIV/0!
Cit	2543.88	2471.96	2487.33	2459.33	2179.66	1868.73	2335.15	261.758		113.061	109.865	110.548	109.303	96.8737	83.0547	103.784	11.6337
Thr	4857.73	7598.84	5906.69	5050.66	4979	4607.22	5500.03	1118.34		215.899	337.726	262.52	224.474	221.289	204.766	244.446	49.704
Ala	16862	21637	22769.9	17275.1	12191.2	14137.1	17478.7	4119.07		749.424	961.645	1011.99	767.781	541.829	628.317	776.832	183.07
NH3+Baib	305.614	221.602	562.31	799.944	271.66	2032.91	699.007	688.982		13.5828	9.84898	24.9916	35.5531	12.0738	90.3517	31.067	30.6214
Carn	3679.32	8518.7	3362.59	4377.25	4683.29	1565.37	4364.42	2309.44		163.525	378.609	149.448	194.544	208.146	69.5721	193.974	102.642
Pro	4383.61	7991.34	4167.91	3556	3209.39	3759.54	4511.3	1756		194.827	355.171	185.24	158.044	142.639	167.09	200.502	78.0443
1M-His	538.049		416.655	309.738	464.936	77.776	361.431	178.948		23.9133		18.518	13.7661	20.6638	3.45671	16.0636	7.95323
Ans	23.155	40.358	355.822	47.592	275.866	60.852	133.941	143.669		1.02911	1.79369	15.8143	2.1152	12.2607	2.70453	5.95293	6.38527
3M-His	681.12	923.169	363.849	511.459	640.865	559.631	613.349	188.072		30.272	41.0297	16.1711	22.7315	28.4829	24.8725	27.2599	8.35877
Crea	568.844	831.86	392.282	459.883	449.116	497.019	533.167	157.531		25.282	36.9716	17.4348	20.4392	19.9607	22.0897	23.6963	7.0014
Aab	175.123	145.615	176.656	287.918	130.911	104.543	170.128	63.8472		7.78324	6.47178	7.85138	12.7964	5.81827	4.64636	7.56123	2.83765
Tyr	2748.93	3370.95	2097.11	2630.95	2665.62	2660.83	2695.73	405.812		122.175	149.82	93.2048	116.931	118.472	118.259	119.81	18.0361
Val	8548.41	8937.18	7401.42	8445.69	6467.1	6017.76	7636.26	1201.77		379.929	397.208	328.952	375.364	287.427	267.456	339.389	53.4118
Met	3160.24	4064.26	2632.15	2289.58	2161.04	2174.62	2746.98	748.243		140.455	180.634	116.984	101.759	96.0461	96.65	122.088	33.2552
RgntPk1							#DIV/0!	#DIV/0!								#DIV/0!	#DIV/0!
Cysta1	64.941	68.59	94.317	126.51	33.76		77.6236	34.7672		2.88627	3.04844	4.19187	5.62267	1.50044		3.44994	1.54521
Cysta2	1313.89	1372.85	1253.39	1280.7	450.091	847.4	1086.39	363.718		58.3952	61.0156	55.7062	56.9199	20.004	37.6622	48.2839	16.1652
RgntPk2							#DIV/0!	#DIV/0!								#DIV/0!	#DIV/0!
Cys		50.476	399.115	386.136	177.807	56.035	213.914	170.954			2.24338	17.7384	17.1616	7.90253	2.49044	9.50728	7.59796
Ile	3317.75	3626.91	2571.05	4072.94	2464.62	2716.32	3128.27	647.698		147.456	161.196	114.269	181.019	109.538	120.726	139.034	28.7866
Leu	6939.96	8048.17	5459.75	7428.61	5010.39	4842.36	6288.21	1358.85		308.443	357.697	242.656	330.16	222.684	215.216	279.476	60.3934
Nleu	375	375	375	375	375	375	375	0		16.6667	16.6667	16.6667	16.6667	16.6667	16.6667	16.6667	0
HyLys1	45.851	43.402					44.6265	1.7317		2.03782	1.92898					1.9834	0.0769646
HyLys2	2057.32	2043.21	1351.7	1644.98	1286.92	97.821	1413.66	723.253		91.4365	90.8092	60.0757	73.1103	57.1967	4.3476	62.8293	32.1446
Phe				560.866	429.95	2634.83	1208.55	1236.93					24.9274	19.1089	117.103	53.7132	54.9746
Trp	1534.63	1434.75	1368.23	1645.87	1513.32	1789.17	1547.66	151.172		68.2056	63.7667	60.8101	73.1497	67.2586	79.5185	68.7849	6.71874
Orn	4837.72	6002.02	3085.47	2455.72	2583.35	2053.17	3502.91	1564.96		215.01	266.756	137.132	109.143	114.816	91.252	155.685	69.5537
Lys	6678.48	8965.77	4914.68	5093.2	5872.3	6595.77	6353.37	1475.02		296.821	398.479	218.43	226.364	260.991	293.145	282.372	65.5563
RgntPk3

## Sheet: ALL GENOTYPES
raw pmoles	WT WT		delF WT		delF KO		WT KO						Wt		CFTR (F508del)		Double Mutant		SLC6A14 (KO)
	MEAN	SD	MEAN	SD	MEAN	SD	MEAN	SD				Amino-acid	MEAN (μM)	SD (μM)	MEAN (μM)	SD (μM)	MEAN (μM)	SD (μM)	MEAN (μM)	SD (μM)
Pser	748.762	622.376	912.663	#DIV/0!	756.113	313.37	471.667	#DIV/0!				Pser	33.2783	27.6612	40.5628		33.605	13.9276	20.963
Asp	1277	270.803	1072.89	832.109	899.526	324.858	1406.31	951.639				Asp	56.7558	12.0357	47.6838	36.9826	38.5245	13.7304	62.5026	42.2951
Glu	4734.37	1554.54	3289.01	1868.88	2927.46	1385.35	4902.29	2436.4				Glu	210.416	69.0906	146.178	83.0615	128.785	56.3154	217.88	108.285
Aad	81.9636	33.1783	136.798	72.1435	96.7978	54.6663	111.557	68.7684				Aad	3.64283	1.47459	6.07992	3.20638	4.61844	2.3071	4.95811	3.05638
Hypro	473.857	103.57	519.26	114.364	561.297	150.076	448.839	149.803				Hypro	21.0603	4.60311	23.0782	5.08286	25.727	6.42958	19.9484	6.6579
Ser	4739.97	865.452	4808.18	999.44	5598.52	1636.29	4989.77	1213.62				Ser	210.666	38.4645	213.697	44.4195	248.222	66.4068	221.768	53.9386
Asn	1542.98	239.089	1531.04	250.083	1721.76	518.885	1682.01	315.161				Asn	68.5767	10.6262	68.0464	11.1148	76.9116	21.0773	74.7562	14.0072
Gly	8533.98	2041.29	9055.79	2632.96	10714.3	3190.75	9134.84	1675.57				Gly	379.288	90.7239	402.48	117.02	462.343	134.54	405.993	74.4698
Gln	23780.2	4600.05	24170.3	1696.44	27579.9	5747.73	25474.8	4730.16				Gln	1056.9	204.447	1074.24	75.3971	1249.97	241.828	1132.21	210.229
B-ala	159.24	22.8759	135.684	44.4923	143.901	61.4987	173.392	61.461				B-ala	7.07736	1.0167	6.03039	1.97744	5.96737	2.74033	7.7063	2.7316
Sarc	542.026	#DIV/0!	295.135	#DIV/0!	360.685	#DIV/0!	85.431	#DIV/0!				Tau	1280.87	414.675	1096.71	291.767	1324	400.005	1563.46	422.228
Tau	28819.6	9330.19	24676	6564.76	28168.7	8667.21	35177.9	9500.13				His	74.159	10.6593	66.0565	8.06053	81.1643	8.07191	83.5195	21.2138
His	1668.58	239.835	1486.27	181.362	1823.28	198.773	1879.19	477.31				Arg	17.5555	22.8979	14.0032	10.4633	11.7352	6.23417	19.4569	9.36025
Arg	394.999	515.203	315.071	235.423	267.097	153.402	437.781	210.606				Cit	134.499	34.3184	111.302	28.1523	133.133	35.3885	103.784	11.6337
Gaba	192.093	2.96631	175.859	#DIV/0!	259.87	74.1557	194.22	#DIV/0!				Thr	224.427	34.0126	242.85	50.6254	262.201	71.6073	244.446	49.704
Cit	3026.23	772.163	2504.29	633.426	2881.71	807.511	2335.15	261.758				Ala	705.627	145.485	724.92	110.211	836.932	229.961	776.832	183.07
Thr	5049.61	765.284	5464.12	1139.07	5913.76	1764.46	5500.03	1118.34				NH3+Baib	76.6588	33.6707	43.6544	26.0471	56.4857	35.2652	31.067	30.6214
Ala	15876.6	3273.41	16310.7	2479.76	18169.4	5333.85	17478.7	4119.07				Carn	104.901	44.5082	133.26	88.7398	130.149	88.2981	193.974	102.642
NH3+Baib	1724.82	757.59	982.223	586.06	1193.18	839.482	699.007	688.982				Pro	206.576	46.9176	180.371	20.3172	217.378	107.301	200.502	78.0443
Carn	2360.28	1001.43	2998.36	1996.64	3103.46	2116.33	4364.42	2309.44				1M-His	18.4313	11.347	18.3213	8.29131	15.9944	11.5606	16.0636	7.95323
Pro	4647.96	1055.65	4058.36	457.137	4955.66	2638.06	4511.3	1756				Ans	8.71221	5.70483	3.51867	2.97122	7.96259	4.68445	5.95293	6.38527
1M-His	414.705	255.307	412.229	186.554	336.524	276.786	361.431	178.948				3M-His	14.7902	13.3759	13.0478	10.6414	14.5343	9.67714	27.2599	8.35877
Ans	196.025	128.359	79.17	66.8525	179.885	117.824	133.941	143.669				Crea	20.1064	4.06157	30.4287	10.0817	19.7407	5.06978	23.6963	7.0014
3M-His	332.779	300.959	293.576	239.431	362.77	214.84	613.349	188.072				Aab	7.84436	1.93816	8.05789	1.06919	8.04239	2.71169	7.56123	2.83765
Crea	452.395	91.3853	684.646	226.839	435.94	122.662	533.167	157.531				Tyr	126.817	21.3356	115.567	10.9744	138.887	36.3544	119.81	18.0361
Aab	176.498	43.6085	181.303	24.0567	176.867	65.7786	170.128	63.8472				Val	353.552	70.731	306.237	28.2968	373.339	85.477	339.389	53.4118
Tyr	2853.37	480.051	2600.27	246.923	3132.87	895.751	2695.73	405.812				Met	126.415	16.9451	141.725	34.2841	138.017	53.2621	122.088	33.2552
Val	7954.91	1591.45	6890.34	636.678	8263.27	2069.12	7636.26	1201.77				Cysta1	2.69731	0.0738219	3.66238	0.328946	2.29994	0.90726	3.44994	1.54521
Met	2844.34	381.265	3188.82	771.393	3166.35	1300.83	2746.98	748.243				Cysta2	42.9809	24.2251	40.5848	16.3337	41.0811	25.3156	48.2839	16.1652
RgntPk1	#DIV/0!	#DIV/0!	#DIV/0!	#DIV/0!	#DIV/0!	#DIV/0!	#DIV/0!	#DIV/0!				Cys	5.34953	4.15495	5.29856	0.711451	4.15741	1.77978	9.50728	7.59796
Cysta1	60.6895	1.66099	82.4035	7.40129	51.7487	20.4134	77.6236	34.7672				Ile	157.303	42.4661	131.873	18.0002	167.164	42.3702	139.034	28.7866
Cysta2	967.07	545.064	913.157	367.509	957.786	616.382	1086.39	363.718				Leu	310.46	76.4713	259.559	30.1715	323.972	88.7642	279.476	60.3934
RgntPk2	#DIV/0!	#DIV/0!	#DIV/0!	#DIV/0!	#DIV/0!	#DIV/0!	#DIV/0!	#DIV/0!				Phe	163.992	49.6227	129.181	4.80283	162.6	54.0197	53.7132	54.9746
Cys	120.364	93.4863	119.218	16.0077	101.233	37.7813	213.914	170.954				Trp	63.6345	12.007	69.4632	11.9895	70.5241	13.2093	68.7849	6.71874
Ile	3539.31	955.488	2967.15	405.005	3661.17	1003.28	3128.27	647.698				Orn	142.239	16.1796	93.1208	38.6906	84.5218	39.8676	155.685	69.5537
Leu	6985.35	1720.6	5840.08	678.859	7176.24	2163.1	6288.21	1358.85				Lys	277.336	23.7217	269.353	53.4642	300.571	73.3062	282.372	65.5563
Nleu	375	0	375	0	375	0	375	0
HyLys1	27.6065	7.92737	32.497	#DIV/0!	34.556	#DIV/0!	44.6265	1.7317
HyLys2	682.967	887.062	1221.25	893	1050.26	1038.39	1413.66	723.253
Phe	3689.82	1116.51	2906.57	108.064	3603.19	1396.19	1208.55	1236.93
Trp	1431.78	270.158	1562.92	269.763	1551.73	309.314	1547.66	151.172
Orn	3200.38	364.041	2095.22	870.538	1954.58	970.631	3502.91	1564.96
Lys	6240.06	533.739	6060.43	1202.94	6780.03	1806.13	6353.37	1475.02
RgntPk3
