# Supplementary material for: SLC6A14, an amino acid transporter, modifies the primary CF defect in fluid secretion
Source: eLife journal article supplement (doi:10.7554/elife.37963), 2018-07-13
Supplement: supp [file elife-37963-supp-v1.zip › elife_poa_e37963_Supplementary_file_2.xlsx]

## Sheet: Sheet1
	Genotype			Observed Distribution (n=100)	Expected Distribution
	Sex	Cftr	Slc6a14
	Male	F508del/F508del	(-/y)	7/100	1/16 (6.25%)
	Male	F508del/F508del	(+/y)	5/100	1/16 (6.25%)
	Male	F508del/WT	(-/y)	13/100	1/8 (12.5%)
	Male	F508del/WT	(+/y)	15/100	1/8 (12.5%)
	Male	WT/WT	(-/y)	6/100	1/16 (6.25%)
	Male	WT/WT	(+/y)	6/100	1/16 (6.25%)
	Female	F508del/F508del	(+/-)	5/100	1/16 (6.25%)
	Female	F508del/WT	(+/-)	12/100	1/8 (12.5%)
	Female	F508del/WT	(+/+)	14/100	1/8 (12.5%)
	Female	F508del/F508del	(+/+)	5/100	1/16 (6.25%)
	Female	WT/WT	(+/+)	8/100	1/16 (6.25%)
	Female	WT/WT	(+/-)	4/100	1/16 (6.25%)
